# Supplementary material for: Image-based effective feature generation for protein structural class and ligand binding prediction
Source: PeerJ journal article supplement (doi:10.7717/peerj-cs.253), 2020-02-03
Supplement: Supplementary_File__01.pdf [file Supplementary_File__01.pdf]

# “Image-based effective feature generation for Protein Structural Class and Ligand Binding prediction”

## Supplementary File: 01

This supplementary file contains the accuracy table of various SIFT experiments. The explanation of the features is given below.

|   | Feature                                     | KNN     | Naive Bayesian | SVM     | Adaboost (J48) | Random Forest |
|---|---------------------------------------------|---------|----------------|---------|----------------|---------------|
| 1 | SIFT Keypoint Histogram                     | 67.3396 | 33.0884        | 42.7546 | 61.8062        | 68.2561       |
| 2 | SIFT Wavelet Keypoint Histogram             | 68.8166 | 22.8681        | 33.6941 | 60.0857        | 71.3228       |
| 3 | SIFT Keypoint Histogram on QuadTree         | 63.6202 | 36.6867        | 48.8349 | 60.6027        | 40.0458       |
| 4 | SIFT Wavelet Keypoint Histogram on QuadTree | 63.6202 | 36.6867        | 48.8349 | 60.6027        | 69.2664       |
| 5 | SIFT Canny Keypoint Histogram               | 66.2992 | 37.8556        | 41.0938 | 51.0679        | 63.8694       |
| 6 | SIFT QuadTree descriptor                    | 73.1497 | 30.6459        |         |                | 74.0835       |
| 7 | SIFT descriptor 16                          | 72.246  | 46.178         | 55.814  | 64.629         | 75.09         |

Table 1: Classifier accuracies for different types of SIFT feature

### 1. SIFT Keypoint Histogram

It selects how many key points the sift Feature detector has detected according to the x-axis of the image. It sums up the int value of keypoints (which comes as float) on the x-axis.

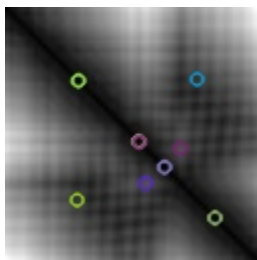

## 2. SIFT Wavelet Keypoint Histogram

The image is wavelet transformed and then SIFT Keypoint Histogram is applied.

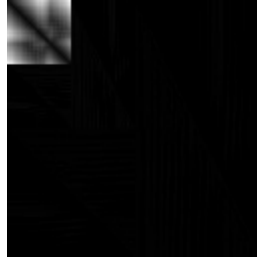

## 3. SIFT Keypoint Histogram on QuadTree

It splits the image into equally 4 parts and gets histogram of keypoints from the x-axis.

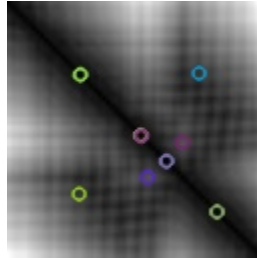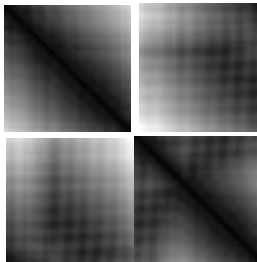

## 4. SIFT Wavelet Keypoint Histogram on QuadTree

The image is wavelet transformed . and then the previous procedure is done.

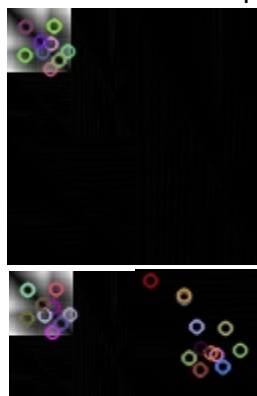

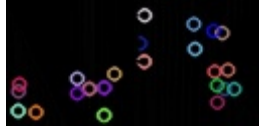

### 5. SIFT Canny Keypoint Histogram

Canny edge detector is used for transform the images and then SIFT Keypoint Histogram is used.

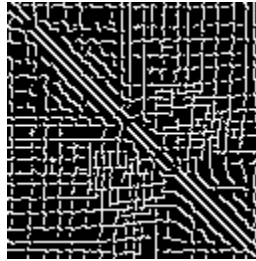

### 6. SIFT QuadTree descriptor

One descriptor from each of the quad images are taken, so there is 4 descriptor per image as an instance.

### 7. SIFT descriptor 16

Each image is divided into 16 images and from each image 1 descriptor is taken. So, there are total of 16 descriptors per image.
