# Supplementary material for: Image-based effective feature generation for protein structural class and ligand binding prediction
Source: PeerJ journal article supplement (doi:10.7717/peerj-cs.253), 2020-02-03
Supplement: Supplementary_File__03.pdf [file Supplementary_File__03.pdf]

# “Image-based effective feature generation for Protein Structural Class and Ligand Binding prediction”

## Supplementary File: 03

This supplementary file contains the results of the performance metrics (accuracy, sensitivity, specificity, f1 score) of the feature group ComogPhog. The dataset of the feature group is stratified into 10 folds. For each fold, the fold is used as test dataset and the rest of the dataset (9 folds) is used as train dataset. SMOTE is used for each train dataset to balance the classes. Table 1,2,3 and 4 contains the individual result of each stratified dataset and average result for each classifier on the accuracy, sensitivity, specificity, f1 score respectively.

| Category         | Features       | Random Forest | AdaBoost      |         | KNN (5) | Naïve Bayes | SVM     |
|------------------|----------------|---------------|---------------|---------|---------|-------------|---------|
|                  |                |               | Random Forest | J48     |         |             |         |
| Stratified 10-1  | ComogPHOG      | 73.8698       | 74.141        | 72.604  | 69.6203 | 56.6908     | 76.7631 |
| Stratified 10-2  | ComogPHOG      | 71.6998       | 72.1519       | 71.2477 | 67.2694 | 55.1537     | 76.4014 |
| Stratified 10-3  | ComogPHOG      | 73.2127       | 72.8507       | 72.2172 | 68.0543 | 54.8416     | 75.9276 |
| Stratified 10-4  | ComogPHOG      | 75.4751       | 75.2941       | 71.6742 | 67.5113 | 58.4615     | 75.4751 |
| Stratified 10-5  | ComogPHOG      | 75.3846       | 75.0226       | 73.5747 | 68.9593 | 55.8371     | 77.1946 |
| Stratified 10-6  | ComogPHOG      | 77.1041       | 78.19         | 75.2036 | 69.5928 | 58.009      | 77.9186 |
| Stratified 10-7  | ComogPHOG      | 73.3032       | 74.0271       | 72.0362 | 63.5294 | 57.2851     | 74.0271 |
| Stratified 10-8  | ComogPHOG      | 73.1222       | 73.8462       | 71.6742 | 70.6787 | 56.3801     | 78.371  |
| Stratified 10-9  | ComogPHOG      | 75.5656       | 75.8371       | 72.6697 | 67.5113 | 55.9276     | 76.3801 |
| Stratified 10-10 | ComogPHOG      | 74.0271       | 74.1176       | 72.1267 | 67.6018 | 55.4751     | 76.8326 |
|                  | <b>Average</b> | 74.276        | 74.548        | 72.503  | 68.033  | 56.406      | 76.529  |

Table 1: Classifier accuracies for each stratified dataset of ComogPHOG

| Category         | Features       | Random Forest | AdaBoost      |        | KNN (5) | Naïve Bayes | SVM    |
|------------------|----------------|---------------|---------------|--------|---------|-------------|--------|
|                  |                |               | Random Forest | J48    |         |             |        |
| Stratified 10-1  | ComogPHOG      | 0.739         | 0.741         | 0.726  | 0.696   | 0.567       | 0.768  |
| Stratified 10-2  | ComogPHOG      | 0.717         | 0.722         | 0.712  | 0.673   | 0.552       | 0.764  |
| Stratified 10-3  | ComogPHOG      | 0.732         | 0.729         | 0.722  | 0.681   | 0.548       | 0.759  |
| Stratified 10-4  | ComogPHOG      | 0.755         | 0.753         | 0.717  | 0.675   | 0.585       | 0.755  |
| Stratified 10-5  | ComogPHOG      | 0.754         | 0.75          | 0.736  | 0.69    | 0.558       | 0.772  |
| Stratified 10-6  | ComogPHOG      | 0.771         | 0.782         | 0.752  | 0.696   | 0.58        | 0.779  |
| Stratified 10-7  | ComogPHOG      | 0.733         | 0.74          | 0.72   | 0.635   | 0.573       | 0.74   |
| Stratified 10-8  | ComogPHOG      | 0.731         | 0.738         | 0.717  | 0.707   | 0.564       | 0.784  |
| Stratified 10-9  | ComogPHOG      | 0.756         | 0.758         | 0.727  | 0.675   | 0.559       | 0.764  |
| Stratified 10-10 | ComogPHOG      | 0.74          | 0.741         | 0.721  | 0.676   | 0.555       | 0.768  |
|                  | <b>Average</b> | 74.28%        | 74.54%        | 72.50% | 68.04%  | 56.41%      | 76.53% |

Table 2: Classifier sensitivity for each stratified dataset of ComogPHOG

| Category         | Features       | Random Forest | AdaBoost      |        | KNN (5) | Naïve Bayes | SVM    |
|------------------|----------------|---------------|---------------|--------|---------|-------------|--------|
|                  |                |               | Random Forest | J48    |         |             |        |
| Stratified 10-1  | ComogPHOG      | 0.931         | 0.934         | 0.929  | 0.931   | 0.893       | 0.943  |
| Stratified 10-2  | ComogPHOG      | 0.93          | 0.93          | 0.928  | 0.934   | 0.887       | 0.945  |
| Stratified 10-3  | ComogPHOG      | 0.931         | 0.928         | 0.924  | 0.929   | 0.885       | 0.945  |
| Stratified 10-4  | ComogPHOG      | 0.937         | 0.936         | 0.925  | 0.928   | 0.897       | 0.947  |
| Stratified 10-5  | ComogPHOG      | 0.935         | 0.936         | 0.932  | 0.934   | 0.895       | 0.947  |
| Stratified 10-6  | ComogPHOG      | 0.946         | 0.948         | 0.935  | 0.933   | 0.898       | 0.949  |
| Stratified 10-7  | ComogPHOG      | 0.93          | 0.935         | 0.929  | 0.916   | 0.913       | 0.941  |
| Stratified 10-8  | ComogPHOG      | 0.932         | 0.934         | 0.925  | 0.931   | 0.893       | 0.951  |
| Stratified 10-9  | ComogPHOG      | 0.939         | 0.941         | 0.927  | 0.938   | 0.895       | 0.947  |
| Stratified 10-10 | ComogPHOG      | 0.93          | 0.931         | 0.924  | 0.924   | 0.893       | 0.949  |
|                  | <b>Average</b> | 93.41%        | 93.53%        | 92.78% | 92.98%  | 89.49%      | 94.64% |

Table 3: Classifier specificity for each stratified dataset of ComogPHOG

| Category         | Features       | Random Forest | AdaBoost      |        | KNN (5) | Naïve Bayes | SVM    |
|------------------|----------------|---------------|---------------|--------|---------|-------------|--------|
|                  |                |               | Random Forest | J48    |         |             |        |
| Stratified 10-1  | ComogPHOG      | 0.739         | 0.743         | 0.728  | 0.704   | 0.565       | 0.774  |
| Stratified 10-2  | ComogPHOG      | 0.719         | 0.723         | 0.714  | 0.686   | 0.548       | 0.769  |
| Stratified 10-3  | ComogPHOG      | 0.734         | 0.731         | 0.725  | 0.69    | 0.544       | 0.769  |
| Stratified 10-4  | ComogPHOG      | 0.757         | 0.752         | 0.719  | 0.687   | 0.586       | 0.764  |
| Stratified 10-5  | ComogPHOG      | 0.755         | 0.752         | 0.738  | 0.702   | 0.559       | 0.781  |
| Stratified 10-6  | ComogPHOG      | 0.774         | 0.784         | 0.754  | 0.709   | 0.585       | 0.786  |
| Stratified 10-7  | ComogPHOG      | 0.733         | 0.74          | 0.723  | 0.646   | 0.592       | 0.749  |
| Stratified 10-8  | ComogPHOG      | 0.731         | 0.74          | 0.718  | 0.714   | 0.567       | 0.792  |
| Stratified 10-9  | ComogPHOG      | 0.755         | 0.76          | 0.727  | 0.694   | 0.564       | 0.77   |
| Stratified 10-10 | ComogPHOG      | 0.739         | 0.741         | 0.721  | 0.683   | 0.553       | 0.774  |
|                  | <b>Average</b> | 74.36%        | 74.66%        | 72.67% | 69.15%  | 56.63%      | 77.28% |

Table 4: Classifier f1 score for each stratified dataset of ComogPHOG
