# Supplementary material for: Image-based effective feature generation for protein structural class and ligand binding prediction
Source: PeerJ journal article supplement (doi:10.7717/peerj-cs.253), 2020-02-03
Supplement: Supplementary_File__04.pdf [file Supplementary_File__04.pdf]

# “Image-based effective feature generation for Protein Structural Class and Ligand Binding prediction”

## Supplementary File: 04

This supplementary file contains the comparison of the performance metrics (accuracy, sensitivity, specificity, f1 score) between the feature group ABCDE (Hybrid LBP) and ComogPHOG.

| Performance Metric | Features  | Random Forest   | AdaBoost        |                 | KNN (5)         | Naïve Bayes     | SVM             |
|--------------------|-----------|-----------------|-----------------|-----------------|-----------------|-----------------|-----------------|
|                    |           |                 | Random Forest   | J48             |                 |                 |                 |
| Accuracy           | HybridLBP | <b>76.76406</b> | <b>77.21659</b> | <b>76.25756</b> | 51.37542        | 35.35132        | <b>77.27113</b> |
|                    | ComogPHOG | 74.27642        | 74.54783        | 72.50282        | <b>68.03286</b> | <b>56.40616</b> | 76.52912        |
| Sensitivity        | HybridLBP | <b>0.7676</b>   | <b>0.7721</b>   | <b>0.7625</b>   | 0.5137          | 0.3534          | <b>0.7728</b>   |
|                    | ComogPHOG | 0.7428          | 0.7454          | 0.725           | <b>0.6804</b>   | <b>0.5641</b>   | 0.7653          |
| Specificity        | HybridLBP | 0.9334          | 0.9338          | <b>0.9302</b>   | 0.9293          | 0.8409          | <b>0.9504</b>   |
|                    | ComogPHOG | <b>0.9341</b>   | <b>0.9353</b>   | 0.9278          | <b>0.9298</b>   | <b>0.8949</b>   | 0.9464          |
| F1 Score           | HybridLBP | <b>0.7677</b>   | <b>0.7718</b>   | <b>0.7623</b>   | 0.5421          | 0.3188          | <b>0.7828</b>   |
|                    | ComogPHOG | 0.7436          | 0.7466          | 0.7267          | <b>0.6915</b>   | <b>0.5663</b>   | 0.7728          |
