# Supplementary material for: Image-based effective feature generation for protein structural class and ligand binding prediction
Source: PeerJ journal article supplement (doi:10.7717/peerj-cs.253), 2020-02-03
Supplement: Supplementary_File__07.pdf [file Supplementary_File__07.pdf]

# “Image-based effective feature generation for Protein Structural Class and Ligand Binding prediction”

---

## Supplementary File: 07

This supplementary file contains the results of the performance metrics (accuracy, sensitivity, specificity, f1 score) of the different feature proposed on our paper. The dataset of the feature group is stratified into 10 folds. For each fold, the fold is used as test dataset and the rest of the dataset (9 folds) is used as train dataset. SMOTE is used for each train dataset to balance the classes. Table 1,2,3 and 4 contains the individual result of each stratified dataset and average result for each classifier on the accuracy, sensitivity, specificity, f1 score respectively.

| Image Type | Features | Random Forest  | Adaboost       |               | KNN (5)        | Naïve Bayes    | SVM            |
|------------|----------|----------------|----------------|---------------|----------------|----------------|----------------|
|            |          |                | Random Forest  | J48           |                |                |                |
| scaled     | A        | 75.1356        | 75.0452        | 68.6257       | 50.8137        | 50.6329        | 69.1682        |
| non-scaled | A        | 75.859         | 75.3165        | 72.1519       | 53.8879        | 34.5389        | 68.4448        |
| scaled     | B        | 30.8318        | 31.5552        | 24.8644       | 21.9711        | 8.5895         | 17.4503        |
| non-scaled | B        | 42.8571        | 41.953         | 37.2514       | 30.8318        | 25.4069        | 23.2369        |
| none       | C        | 39.5118        | 37.8843        | 36.0759       | 15.8228        | 5.6058         | 25.7685        |
| scaled     | D        | 74.774         | 74.774         | 70.9765       | <b>69.4394</b> | 48.0108        | 67.6311        |
| scaled     | E        | 74.0506        | 73.9602        | 72.604        | 61.302         | <b>56.2387</b> | 64.7378        |
|            | AB       | 73.5081        | 73.5081        | 71.3382       | 51.7179        | 32.4593        | 68.8969        |
|            | ABC      | 74.2315        | 73.8698        | 69.8011       | 27.3056        | 32.2785        | 68.6257        |
|            | ABCD     | 77.8481        | 77.2152        | 72.8752       | 41.7722        | 33.3635        | 74.6835        |
|            | ABCDE    | <b>78.6618</b> | <b>78.2098</b> | <b>75.226</b> | 50.2712        | 34.5389        | <b>77.2152</b> |

Table 1: Classifier accuracies for different feature group

| Image Type | Features | Random Forest | Adaboost      |       | KNN (5) | Naïve Bayes | SVM   |
|------------|----------|---------------|---------------|-------|---------|-------------|-------|
|            |          |               | Random Forest | J48   |         |             |       |
| scaled     | A        | 0.751         | 0.75          | 0.686 | 0.508   | 0.506       | 0.692 |
| non-scaled | A        | 0.759         | 0.753         | 0.722 | 0.539   | 0.345       | 0.684 |
| scaled     | B        | 0.308         | 0.316         | 0.249 | 0.22    | 0.086       | 0.175 |
| non-scaled | B        | 0.429         | 0.42          | 0.373 | 0.308   | 0.254       | 0.232 |
| none       | C        | 0.395         | 0.379         | 0.361 | 0.158   | 0.056       | 0.258 |
| scaled     | D        | 0.748         | 0.748         | 0.71  | 0.694   | 0.48        | 0.676 |
| scaled     | E        | 0.741         | 0.74          | 0.726 | 0.613   | 0.562       | 0.647 |
|            | AB       | 0.735         | 0.735         | 0.713 | 0.517   | 0.325       | 0.689 |
|            | ABC      | 0.742         | 0.739         | 0.698 | 0.273   | 0.323       | 0.686 |
|            | ABCD     | 0.778         | 0.772         | 0.729 | 0.418   | 0.334       | 0.747 |
|            | ABCDE    | 0.787         | 0.782         | 0.752 | 0.503   | 0.345       | 0.772 |

Table 2: Classifier sensitivity for different feature group

| Image Type | Features | Random Forest | Adaboost      |       | KNN (5) | Naïve Bayes | SVM   |
|------------|----------|---------------|---------------|-------|---------|-------------|-------|
|            |          |               | Random Forest | J48   |         |             |       |
| scaled     | A        | 0.926         | 0.929         | 0.908 | 0.933   | 0.887       | 0.942 |
| non-scaled | A        | 0.929         | 0.929         | 0.92  | 0.932   | 0.826       | 0.943 |
| scaled     | B        | 0.785         | 0.788         | 0.787 | 0.833   | 0.935       | 0.871 |
| non-scaled | B        | 0.828         | 0.827         | 0.815 | 0.858   | 0.841       | 0.86  |
| none       | C        | 0.79          | 0.782         | 0.797 | 0.889   | 0.971       | 0.868 |
| scaled     | D        | 0.94          | 0.939         | 0.924 | 0.939   | 0.905       | 0.947 |
| scaled     | E        | 0.935         | 0.936         | 0.928 | 0.938   | 0.907       | 0.951 |
|            | AB       | 0.921         | 0.922         | 0.915 | 0.907   | 0.83        | 0.941 |
|            | ABC      | 0.919         | 0.919         | 0.906 | 0.899   | 0.827       | 0.935 |
|            | ABCD     | 0.933         | 0.933         | 0.92  | 0.912   | 0.83        | 0.948 |
|            | ABCDE    | 0.938         | 0.934         | 0.929 | 0.927   | 0.835       | 0.953 |

Table 3: Classifier specificity for different feature group

| Image Type | Features | Random Forest | Adaboost      |       | KNN (5) | Naïve Bayes | SVM   |
|------------|----------|---------------|---------------|-------|---------|-------------|-------|
|            |          |               | Random Forest | J48   |         |             |       |
| scaled     | A        | 0.749         | 0.75          | 0.69  | 0.534   | 0.514       | 0.711 |
| non-scaled | A        | 0.758         | 0.754         | 0.723 | 0.561   | 0.297       | 0.698 |
| scaled     | B        | 0.29          | 0.297         | 0.25  | 0.235   | 0.093       | 0.193 |
| non-scaled | B        | 0.405         | 0.399         | 0.363 | 0.31    | 0.183       | 0.193 |
| none       | C        | 0.353         | 0.336         | 0.35  | 0.167   | 0.025       | 0.268 |
| scaled     | D        | 0.756         | 0.756         | 0.714 | 0.708   | 0.513       | 0.703 |
| scaled     | E        | 0.745         | 0.743         | 0.73  | 0.641   | 0.586       | 0.685 |
|            | AB       | 0.735         | 0.735         | 0.716 | 0.524   | 0.275       | 0.7   |
|            | ABC      | 0.741         | 0.737         | 0.696 | 0.271   | 0.272       | 0.697 |
|            | ABCD     | 0.777         | 0.771         | 0.73  | 0.425   | 0.286       | 0.759 |
|            | ABCDE    | 0.785         | 0.779         | 0.753 | 0.53    | 0.305       | 0.784 |

Table 4: Classifier f1 score for different feature group
